# Supplementary material for: Facile synthesis and electrochemistry of a new cubic rocksalt LixVyO2 (x = 0.78, y = 0.75) electrode material
Source: Royal Society of Chemistry journal article supplement (doi:10.1039/c6ta09377a), 2017-01-01
Supplement: c6ta09377a1.pdf [file c6ta09377a1.pdf]

## Electronic Supplementary Information

### Facile synthesis and electrochemistry of new cubic rocksalt $\text{Li}_x\text{V}_y\text{O}_2$ ( $x=0.78$ , $y=0.75$ ) electrode material

Wanqun Zhang,<sup>\*a</sup> jingjing Luo,<sup>b</sup> xiaona Li,<sup>b</sup> Jianwen Liang,<sup>b</sup> Yongchun Zhu<sup>b</sup> and Yitai Qian<sup>b</sup>

<sup>a</sup> School of Chemistry and Materials Science, University of Science and Technology of China, Hefei, 230026, P. R. China; <sup>b</sup> Division of Nanomaterials and chemistry, Hefei National Laboratory for Physical Sciences at Microscale, Department of Chemistry, University of Science and Technology of China, Hefei, 230026, Anhui, P. R.China.

\* To whom correspondence should be addressed. E-mail:

[wqz@ustc.edu.cn](mailto:wqz@ustc.edu.cn).

Table S1. Crystallographic parameters for as-prepared  $\text{Li}_{0.78}\text{V}_{0.75}\text{O}_2$ .

$Fm\bar{3}m$ .  $a = 4.3247(12)$

| Atom | Wyckoff symbol | x/a | y/b | z/c | Biso    | occupancy |
|------|----------------|-----|-----|-----|---------|-----------|
| Li   | 4a             | 0   | 0   | 0   | 2.69(6) | 0.391(6)  |
| V    | 4a             | 0   | 0   | 0   | 2.69(6) | 0.375(4)  |
| O    | 4b             | 0.5 | 0.5 | 0.5 | 1.85(4) | 1         |

R-factors:  $R_{\text{exp}} = 6.02\%$ ,  $R_{\text{wp}} = 6.16\%$ ,  $R_p = 4.70\%$

Table S2. Crystallographic parameters for  $\text{Li}_x\text{V}_y\text{O}_2$  obtained by annealing  $\text{Li}_{0.78}\text{V}_{0.75}\text{O}_2$  at 800 °C in argon.

$R\bar{3}m$ .  $a = 2.9659(7)$ ,  $c = 14.910(3)$

| Atom | Wyckoff symbol | x/a | y/b | z/c         | Biso     | occupancy |
|------|----------------|-----|-----|-------------|----------|-----------|
| Li   | 3a             | 0   | 0   | 0           | 3.1(3)   | 0.83(5)   |
| V    | 3b             | 0   | 0   | 0.5         | 1.05(3)  | 0.77(3)   |
| O    | 6c             | 0   | 0   | 0.24617(14) | 2.144(5) | 1         |

R-factors:  $R_{\text{exp}} = 4.25\%$ ,  $R_{\text{wp}} = 8.63\%$ ,  $R_{\text{p}} = 6.16\%$

Table. S3. Comparison of  $\text{Li}_{0.78}\text{V}_{0.75}\text{O}_2$  (this work) and various reported  $\text{Li}_x\text{V}_y\text{O}_2$  composites as anodes for Li-ion batteries.

| Material                                              | Reversible capacity/mAh $\text{g}^{-1}$ | Rate                   | Ref       |
|-------------------------------------------------------|-----------------------------------------|------------------------|-----------|
| $\text{Li}_{0.78}\text{V}_{0.75}\text{O}_2$           | 500/500 <sup>th</sup> cycles            | 500 mA $\text{g}^{-1}$ | This work |
| $\text{Li}_{1+0.2}\text{VO}_2$                        | 294/25 <sup>th</sup> cycles             | 0.1 C                  | 12        |
| $\text{Li}_{1.07}\text{V}_{0.93}\text{O}_2$           | 100/10 <sup>th</sup> cycles             | 10 mA $\text{g}^{-1}$  | 22        |
| Carbon-coat $\text{Li}_{1.1}\text{V}_{0.9}\text{O}_2$ | 150/20 <sup>th</sup> cycles             | 0.1 C                  | 28        |
| $\text{Li}_{1.075}\text{V}_{0.925}\text{O}_2$         | ~175/30 <sup>th</sup> cycles            | 44 mA $\text{g}^{-1}$  | 29        |

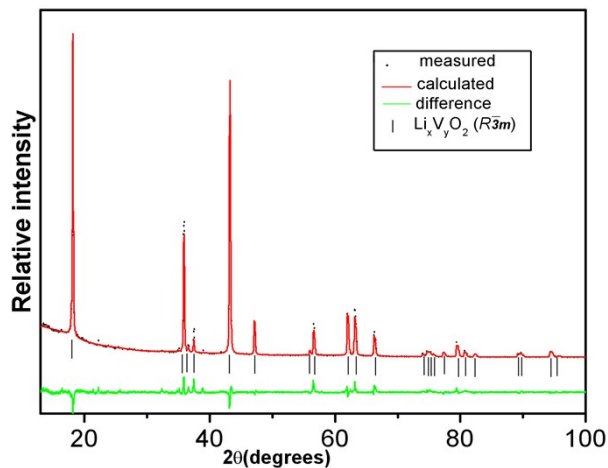

Fig. S1 Refined powder X-ray diffraction pattern for  $\text{Li}_x\text{V}_y\text{O}_2$  obtained by annealing  $\text{Li}_{0.78}\text{V}_{0.75}\text{O}_2$  at 800 °C in a following argon atmosphere. Dots represent observed data and solid line the calculated pattern. The lower line is the difference/esd.

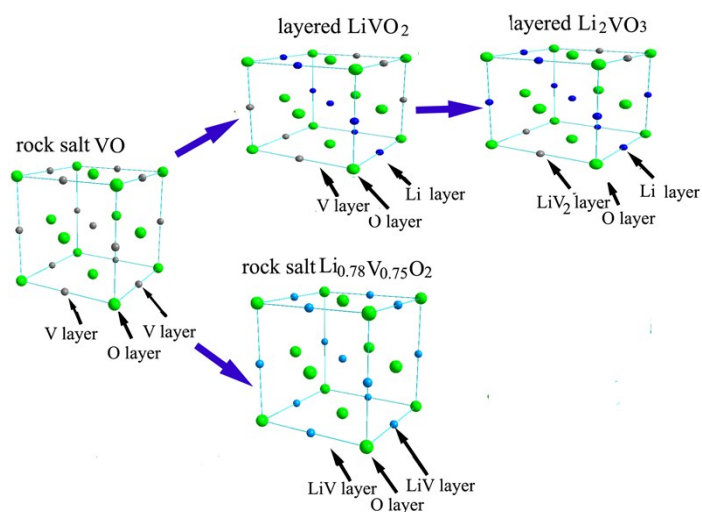

Fig. S2 Structural illustration of rock salt VO and  $\text{Li}_{0.78}\text{V}_{0.75}\text{O}_2$ , layered  $\text{LiVO}_2$  and  $\text{Li}_2\text{VO}_3$

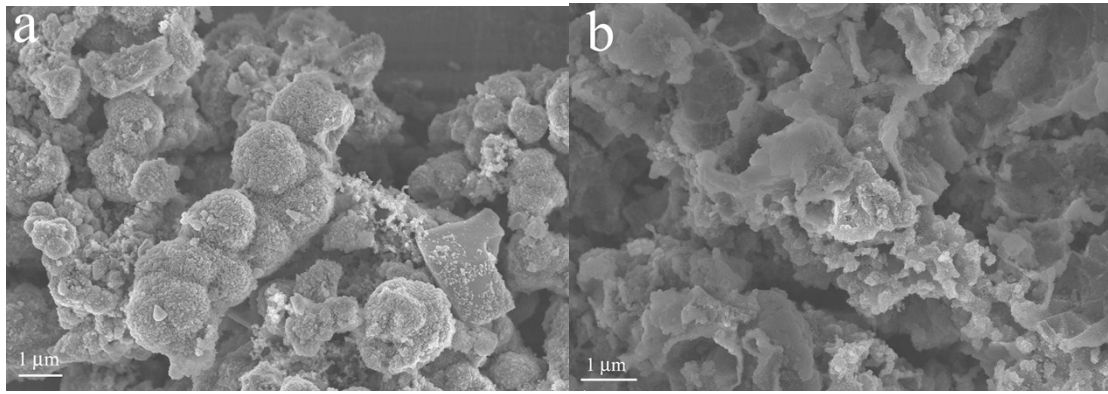

Fig. S3 FESEM images of  $\text{Li}_{0.78}\text{V}_{0.75}\text{O}_2$  composite electrode after 40 (a) and 150 (b) electrochemical cycles at the current of  $500 \text{ mA g}^{-1}$ , respectively
